# Supplementary material for: Rising risk of elephant-caused human casualties in Tropical Asia
Source: Research Square preprint supplement (doi:10.21203/rs.3.rs-8113717/v1), 2026-02-04
Supplement: Supplementary file 1 [file ba96cfc8aaecf98c8ddebb59.pdf]

## Supplementary Information

### Rising risk of elephant-caused human casualties in Tropical Asia

*Naufal Rahman Avicena, Christos Mammides, Ashok Kumar Ram, Aritra Kshetry, Wai Phyo Thu, Nyein Aung, Tomas Maul, Salman Saaban, Benoit Goossens, Ee Phin Wong, Alex M. Lechner, Ahimsa Campos-Arceiz*

#### Appendix S1 – Searching protocol

Searches were conducted in English and country-specific languages using online databases (Web of Science, Google Scholar, Scopus) and search engines (Google, Baidu). A set of keywords were designed to return potentially relevant information from the online platforms. Keywords include “*Asian elephants*”, “*Elephas maximus*”, “*Elephant*”, combined with “*attacks*”, “*conflict*”, “*mortalities*”, “*death*”, “*injury*”, “*trampled*”, “*human*”, “*people*”, and “*killing*”. Additional keywords mentioning the target country were also added. Non-English documents were translated with online tools (Google Translate, ChatGPT, or Gemini) and verified by native speakers where necessary. For each case, we recorded details of the incident: (1) location (GPS coordinates when provided, otherwise geocoded from place names), (2) type of casualty (fatality or injury), victim and elephant demographics, and victim activity where reported. Geocoding and digitizing were performed in QGIS 3.40.12. Duplicates were removed by cross-matching date, location, and narrative. Reports lacking sufficient geographic information were excluded (19% of the initial reports).

#### Appendix S2 – Combining deaths and injuries as a single category

We combined data on human deaths and injuries as casualties to improve predictive power. To test whether deaths and injuries could be pooled, we compare two regression models (one with deaths, one with injuries) to calculate the similarity between the coefficients' estimates and standard errors of the two fitted models using z-test (Clogg *et al.* 1995; Paternoster *et al.*, 1998), expressed as:

$$Z = \frac{\beta_1 - \beta_2}{\sqrt{((SE\beta_1)^2 + (SE\beta_2)^2)}}$$

where  $\beta$  is the model's coefficient, and  $SE\beta$  is the coefficient's standard error.

**Table S1.** Sets of models, arranged in an ascending order based on AIC and  $\Delta$ AIC.

| <b>Model</b>                                             | <b>Form</b>                                                                                                                                                                                                     | <b>AIC</b> | <b><math>\Delta</math>AIC</b> |
|----------------------------------------------------------|-----------------------------------------------------------------------------------------------------------------------------------------------------------------------------------------------------------------|------------|-------------------------------|
| <i>Full model with quadratic terms</i>                   | att ~ ed + mesh + tri + wetness + popdens +<br>gdp + hfp + dist_forest + dist_fp +<br>dist_cropland + dist_pa + I(dist_forest^2) +<br>I(dist_fp^2) + I(dist_cropland^2) +<br>I(dist_pa^2) + Matern (1 long+lat) | 1485.9     | 0                             |
| <i>Full model without quadratic terms</i>                | att ~ ed + mesh + tri + wetness + popdens +<br>gdp + hfp + dist_forest + dist_fp +<br>dist_cropland + dist_pa + Matern<br>(1 long+lat)                                                                          | 1519       | 33.1                          |
| <i>Potential HEC with quadratic terms</i>                | att ~ dist_forest + dist_fp + dist_cropland +<br>dist_pa + I(dist_forest^2) + I(dist_fp^2) +<br>I(dist_cropland^2) + I(dist_pa^2) +<br>Matern(1 long+lat)                                                       | 1538.9     | 53                            |
| <i>Potential HEC</i>                                     | att ~ dist_forest + dist_fp + dist_cropland +<br>dist_pa + Matern(1 long+lat)                                                                                                                                   | 1572.8     | 86.9                          |
| <i>Habitat and natural resources with quadratic term</i> | att ~ wetness + I(wetness^2) +<br>Matern(1 long+lat)                                                                                                                                                            | 1615.      | 129.4                         |
| <i>Topography</i>                                        | att ~ tri + Matern(1 long+lat)                                                                                                                                                                                  | 1618.2     | 132.3                         |
| <i>Forest fragmentation</i>                              | att ~ ed + mesh + Matern(1 long+lat)                                                                                                                                                                            | 1627.8     | 141.9                         |
| <i>Human disturbance</i>                                 | att ~ hfp + Matern(1 long+lat)                                                                                                                                                                                  | 1644.1     | 158.2                         |
| <i>Habitat and natural resources</i>                     | att ~ wetness + Matern(1 long+lat)                                                                                                                                                                              | 1645.9     | 160                           |
| <i>Null model</i>                                        | att ~ 1 + Matern(1 long+lat)                                                                                                                                                                                    | 1652.2     | 166.3                         |
| <i>Socioeconomic</i>                                     | att ~ popdens + gdp + Matern(1 long+lat)                                                                                                                                                                        | 1653.8     | 167.9                         |

*Abbreviations:* att = human casualties; ed = edge density, mesh = effective mesh size, tri = terrain ruggedness index, wetness = tasseled cap wetness index, popdens = human population density, gdp = gross domestic product, dist\_forest = distance to forest, dist\_fp = distance to forest plantations, dist\_cropland = distance to cropland, dist\_pa = distance to protected areas, hfp = human footprint

**Table S2.** Elephant-caused human casualties risk distribution in 2015. Percentages are relative to respective countries; brackets are size in km<sup>2</sup>. (\*) indicates area at risk relative to the study area.

| <b>Country</b>                | <b>Low</b>           | <b>Moderate</b>    | <b>High</b>        | <b>Severe</b>   | <b>*Area at Risk</b> |
|-------------------------------|----------------------|--------------------|--------------------|-----------------|----------------------|
| <i>Sri Lanka</i>              | 12.5%<br>(6,836)     | 41.8%<br>(22,900)  | 44%<br>(24,071)    | 1.7%<br>(920)   | 0.9 % (54,729)       |
| <i>Sabah<br/>(Malaysia)</i>   | 46.3%<br>(26,667)    | 31.4%<br>(18,045)  | 18.4%<br>(10,608)  | 3.9%<br>(2,242) | 1% (57,564)          |
| <i>Cambodia</i>               | 46.4%<br>(96,149)    | 30.9%<br>(63,938)  | 21.6%<br>(44,749)  | 1.2%<br>(2,413) | 3.4%<br>(207,250)    |
| <i>Thailand</i>               | 54.2%<br>(433,247)   | 29.5%<br>(235,854) | 15.8%<br>(126,487) | 0.5%<br>(3,583) | 13%<br>(799,172)     |
| <i>Vietnam</i>                | 58.4%<br>(348,357)   | 26.6%<br>(158,966) | 14.4%<br>(86,177)  | 0.6%<br>(3,488) | 9.7%<br>(596,989)    |
| <i>Laos</i>                   | 60.7%<br>(348,365)   | 25.9%<br>(148,709) | 13.1%<br>(75,400)  | 0.3%<br>(1,498) | 9.3%<br>(573,972)    |
| <i>Peninsula<br/>Malaysia</i> | 66.7%<br>(101,575)   | 27.1%<br>(41,199)  | 6%<br>(9,142)      | 0.2%<br>(346)   | 2.5%<br>(152,263)    |
| <i>Bangladesh</i>             | 68.2%<br>(97,818)    | 25.2%<br>(36,154)  | 6.5%<br>(9,273)    | 0.1%<br>(127)   | 2.3%<br>(143,373)    |
| <i>India</i>                  | 70.9%<br>(1,161,332) | 20.3%<br>(332,611) | 8.6%<br>(140,901)  | 0.3%<br>(4,009) | 27%<br>(1,638,855)   |
| <i>Sumatra,<br/>Indonesia</i> | 73.6%<br>(362,933)   | 22.2%<br>(109,499) | 4.1%<br>(20,054)   | 0.2%<br>(983)   | 8%<br>(493,471)      |
| <i>Myanmar</i>                | 73.7%<br>(774,995)   | 19.1%<br>(200,391) | 7.1%<br>(75,149)   | 0.1%<br>(1,350) | 17.1%<br>(1,051,887) |
| <i>Nepal</i>                  | 76.9%<br>(126,295)   | 13.2%<br>(21,746)  | 9.4%<br>(15,460)   | 0.5%<br>(874)   | 2.7%<br>(164,376)    |
| <i>Bhutan</i>                 | 82.7%<br>(34,957)    | 9.3% (3,909)       | 7.7%<br>(3,260)    | 0.4%<br>(148)   | 0.7%<br>(42,275)     |
| <i>Yunnan,<br/>China</i>      | 87.1%<br>(169,820)   | 11.4%<br>(22,320)  | 1.5%<br>(2,877)    | 0.01%<br>(16)   | 3.2%<br>(195,034)    |

**Table S3.** Baseline human population size at risk (2015).

| <b>Country</b>                | <b>Moderate</b> | <b>High</b> | <b>Severe</b> | <b>Total</b> |
|-------------------------------|-----------------|-------------|---------------|--------------|
| <i>India</i>                  | 112,679,776     | 43,380,284  | 883,964       | 156,944,024  |
| <i>Myanmar</i>                | 24,712,724      | 10,157,166  | 197,054       | 35,066,944   |
| <i>Thailand</i>               | 19,297,678      | 9,808,117   | 177,619       | 29,283,414   |
| <i>Vietnam</i>                | 14,559,162      | 6,585,284   | 179,459       | 21,323,905   |
| <i>Nepal</i>                  | 10,327,248      | 6,733,308   | 276,392       | 17,336,948   |
| <i>Bangladesh</i>             | 19,213,766      | 4,576,210   | 43,234        | 23,833,209   |
| <i>Laos</i>                   | 11,675,124      | 6,009,674   | 87,538        | 17,772,336   |
| <i>Sri Lanka</i>              | 7,257,112       | 2,931,549   | 45,817        | 10,234,477   |
| <i>Sumatra,<br/>Indonesia</i> | 14,352,103      | 2,111,585   | 65,688        | 16,529,376   |
| <i>Peninsula<br/>Malaysia</i> | 7,591,289       | 1,448,450   | 50,504        | 9,090,242    |
| <i>Cambodia</i>               | 4,611,863       | 2,324,423   | 94,781        | 7,031,067    |
| <i>Bhutan</i>                 | 435,362         | 993,172     | 32,185        | 1,460,719    |
| <i>Sabah,<br/>Malaysia</i>    | 623,308         | 470,250     | 128,602       | 1,222,160    |
| <i>Yunnan,<br/>China</i>      | 2,002,917       | 477,162     | 1,454         | 2,481,533    |

**Table S4.** Projected area at risk by 2050. Percentages are relative to respective countries; brackets are the size in km<sup>2</sup>. (\*) indicates area at risk relative to the study area

| <b>Country</b>                | <b>Low</b>         | <b>Moderate</b>    | <b>High</b>        | <b>Severe</b>    | <b>*Area at Risk</b> |
|-------------------------------|--------------------|--------------------|--------------------|------------------|----------------------|
| <i>Sri Lanka</i>              | 6%<br>(3,462)      | 27%<br>(15,519)    | 50.5%<br>(29,053)  | 16.6%<br>(9,557) | 0.87% (57,593)       |
| <i>Sabah,<br/>Malaysia</i>    | 66.7%<br>(38,719)  | 28.6%<br>(16,583)  | 4.6%<br>(2,672)    | 0.2% (98)        | 0.88% (58,074)       |
| <i>Cambodia</i>               | 40%<br>(89,618)    | 30%<br>(67,036)    | 21.5%<br>(48,075)  | 8.5%<br>(19,116) | 3.4% (223,846)       |
| <i>Thailand</i>               | 53.7%<br>(457,644) | 26.4%<br>(225,348) | 15.4%<br>(131,686) | 4.5%<br>(38,262) | 12.9%<br>(852,942)   |
| <i>Vietnam</i>                | 55.6%<br>(350,547) | 25.3%<br>(159,336) | 14.5%<br>(91,122)  | 4.7%<br>(29,366) | 9.6% (630,372)       |
| <i>Laos</i>                   | 60.2%<br>(363,524) | 24%<br>(144,946)   | 12.2%<br>(73,863)  | 3.6%<br>(21,539) | 9.1% (603,874)       |
| <i>Peninsula<br/>Malaysia</i> | 60.3%<br>(93,136)  | 27.8%<br>(42,873)  | 11%<br>(16,934)    | 1% (1554)        | 2.3% (154,499)       |
| <i>Bangladesh</i>             | 69%<br>(115,494)   | 23%<br>(38,303)    | 7.2%<br>(12,087)   | 1% (1467)        | 2.5% (167,352)       |
| <i>India</i>                  | 70%<br>(1,261,225) | 18.9%<br>(341,803) | 9.2%<br>(165,213)  | 2.1%<br>(38,315) | 27.3%<br>(1,806,558) |
| <i>Sumatra,<br/>Indonesia</i> | 66.8%<br>(332,339) | 26%<br>(129,353)   | 6.8%<br>(33,856)   | 0.6%<br>(2,224)  | 8%<br>(493,471)      |
| <i>Myanmar</i>                | 71.7%<br>(807,579) | 18.9%<br>(212,466) | 7.9%<br>(88,810)   | 1.5%<br>(17,340) | 17% (1,126,196)      |
| <i>Nepal</i>                  | 78.3%<br>(151,119) | 12.7%<br>(24,583)  | 6.5%<br>(12,522)   | 2.4%<br>(4,703)  | 2.9% (192,928)       |
| <i>Bhutan</i>                 | 73.2%<br>(31,225)  | 15.3%<br>(6,544)   | 7.4%<br>(3,152)    | 4%<br>(1,726)    | 0.7%<br>(42,648)     |
| <i>Yunnan,<br/>China</i>      | 85.4%<br>(166,957) | 12.4%<br>(24,310)  | 1.9%<br>(3,683)    | 0.26%<br>(511)   | 3% (195,463)         |

**Table S5.** Projected human population size at risk by 2050.

| <b>Country</b>                | <b>Moderate</b> | <b>High</b> | <b>Severe</b> | <b>Total</b> |
|-------------------------------|-----------------|-------------|---------------|--------------|
| <i>India</i>                  | 136,519,504     | 62,069,136  | 12,518,925    | 211,107,565  |
| <i>Myanmar</i>                | 24,766,404      | 11,528,165  | 2,522,746     | 38,817,315   |
| <i>Thailand</i>               | 17,594,938      | 9,837,038   | 2,891,100     | 30,323,076   |
| <i>Vietnam</i>                | 15,389,817      | 7,304,384   | 1,879,302     | 24,573,503   |
| <i>Nepal</i>                  | 13,758,316      | 7,235,163   | 2,379,862     | 23,373,341   |
| <i>Bangladesh</i>             | 26,034,340      | 8,284,714   | 914,709       | 35,233,763   |
| <i>Laos</i>                   | 10,812,401      | 5,404,986   | 1,444,630     | 17,662,016   |
| <i>Sri Lanka</i>              | 5,908,302       | 8,416,694   | 1,203,520     | 15,528,516   |
| <i>Sumatra,<br/>Indonesia</i> | 20,226,230      | 8,229,399   | 940,104       | 29,395,732   |
| <i>Peninsula<br/>Malaysia</i> | 9,079,643       | 5,169,395   | 865,122       | 15,114,160   |
| <i>Cambodia</i>               | 5,834,804       | 2,340,035   | 817,595       | 8,992,434    |
| <i>Bhutan</i>                 | 409,150         | 850,541     | 800,912       | 2,060,603    |
| <i>Sabah, Malaysia</i>        | 697,685         | 390,541     | 76,648        | 1,164,874    |
| <i>Yunnan, China</i>          | 1,577,841       | 652,339     | 114,759       | 2,344,939    |

**Table S6.** Z-statistics between death and injury model. P-values beyond significance ( $>0.001$ ) indicate no significant differences between coefficients' estimates and standard errors of the two fitted model.

| <b>Coefficient</b>                    | <b>Z-statistics</b> | <b>P-value</b> |
|---------------------------------------|---------------------|----------------|
| <i>Edge Density</i>                   | 0.4                 | 0.69           |
| <i>Effective Mesh Size</i>            | -0.54               | 0.59           |
| <i>Terrain Ruggedness Index</i>       | 2.8                 | 0.005          |
| <i>Tasselled Cap Wetness Index</i>    | 1.26                | 0.2            |
| <i>Human Footprint</i>                | 0.9                 | 0.38           |
| <i>Human Population Density</i>       | -0.47               | 0.64           |
| <i>Gross Domestic Product</i>         | 0.39                | 0.69           |
| <i>Distance to Forest</i>             | 0.32                | 0.75           |
| <i>Distance to Cropland</i>           | -0.91               | 0.36           |
| <i>Distance to Forest Plantations</i> | 1.21                | 0.23           |
| <i>Distance to Protected Areas</i>    | 0.4                 | 0.69           |

**Table S7.** Definitions and sources for the predictor variables. \*\*\* indicates used in the regression analysis. We omitted some variables due to multicollinearity.

| Variable                                    | Description                                                                                                               | Source Dataset               | Usage |
|---------------------------------------------|---------------------------------------------------------------------------------------------------------------------------|------------------------------|-------|
| <b>Fragmentation</b>                        |                                                                                                                           |                              |       |
| <i>Edge density (ed)</i>                    | The amount of edge habitat (forest), representing the number of human–elephant interfaces in a landscape                  | Xu et al. (2024)             | ***   |
| <i>Landscape shape index (lsi)</i>          | Complexity of landscape shapes in relation to how irregular or fragmented the patches are                                 | Xu et al. (2024)             |       |
| <i>Largest patch index (lpi)</i>            | Proportion of the landscape occupied by the largest habitat patch, identifying how dominant a habitat is in certain areas | Xu et al. (2024)             |       |
| <i>Effective mesh size (mesh)</i>           | Measures the connection between patches, representing the connectivity in the area                                        | Xu et al. (2024)             | ***   |
| <i>Patch density (pd)</i>                   | Habitat patches per unit area in relation of fragmentation levels                                                         | Xu et al. (2024)             |       |
| <b>Habitat and Natural Resources</b>        |                                                                                                                           |                              |       |
| <i>Tasseled cap wetness index (wetness)</i> | A proxy for forest quality. Used to also detect changes in forest structure                                               | Landsat 8 Collection 2 (GEE) | ***   |
| <b>Socioeconomic</b>                        |                                                                                                                           |                              |       |
| <i>Human population density (popdens)</i>   | Count of people per unit area                                                                                             | Tatem (2017)                 | ***   |
| <i>Gross domestic product (gdp)</i>         | Measures the economic output of a certain area                                                                            | Wang and Sun (2022)          | ***   |
| <i>Nightlights (vnl)</i>                    | Nighttime lights as seen from satellite data, proxy for economic development                                              | Elvidge et al. (2021)        |       |
| <b>Potential human–elephant conflict</b>    |                                                                                                                           |                              |       |
| <i>Distance to forest (dist_forest)</i>     | Euclidean distance to naturally regenerated manage or unmanaged forests                                                   | Xu et al. (2024)             | ***   |



|                                                 |                                                                              |                            |     |
|-------------------------------------------------|------------------------------------------------------------------------------|----------------------------|-----|
| <i>Distance to cropland (dist_cropland)</i>     | Euclidean distance to cropland                                               | Potapov et al. (2021)      | *** |
| <i>Distance to forest plantations (dist_fp)</i> | Euclidean distance to forest plantations including agroforestry              | Xu et al. (2024)           | *** |
| <i>Distance to protected areas (dist_pa)</i>    | Euclidean distance to protected areas                                        | IUCN and UNEP-WCMC         | *** |
| <b>Human Disturbance</b>                        |                                                                              |                            |     |
| <i>Human footprint (hfp)</i>                    | Index of human pressure on the landscape                                     | Venter et al. (2016)       | *** |
| <b>Topography</b>                               |                                                                              |                            |     |
| <i>Terrain ruggedness index (tri)</i>           | Variability in ground terrain elevation, measures the ruggedness of the land | Danielson and Gesch (2011) | *** |

**Table S8.** List of *a priori* hypotheses of each driver and their references.

| <b>Drivers</b>                                                                                                                                                                         | <b>Model</b>                                                               | <b>Hypotheses</b>                                                                                                                                                                            | <b>References</b>                      |
|----------------------------------------------------------------------------------------------------------------------------------------------------------------------------------------|----------------------------------------------------------------------------|----------------------------------------------------------------------------------------------------------------------------------------------------------------------------------------------|----------------------------------------|
| <i>Potential Human-Elephant Conflict (distance to forest, distance to forest plantations, distance to cropland, and distance to protected areas), with and without quadratic terms</i> | Human Casualties (HC) ~ Potential HEC + Spatial Autocorrelation Term (SAC) | Human casualties will be higher nearer to forests, forest plantations, croplands, and protected areas due to elephant habitat preferences.                                                   | Natarajan <i>et al.</i> , 2023         |
| <i>Habitat and Natural Resources (wetness)</i>                                                                                                                                         | HC ~ Habitat and natural resources + SAC                                   | Elephants prefer disturbed forests due to abundant food resources – wetness characterized forest structure. Human casualties will be higher where food resources are abundant for elephants. | de la Torre <i>et al.</i> , 2021, 2022 |
| <i>Topography (terrain ruggedness index)</i>                                                                                                                                           | HC ~ Topography + SAC                                                      | Elephants prefer flat surfaces; hence encounters are much more likely in less rugged environment.                                                                                            | de la Torre <i>et al.</i> , 2021       |
| <i>Forest Fragmentation (edge density, landscape shape index, largest patch index, effective mesh size, and patch density)</i>                                                         | HC ~ Fragmentation + SAC                                                   | Elephants prefer the periphery of forest. Fragmentation indicates higher human-elephant interfaces. Human casualties will be higher where forests are more fragmented.                       | Acharya <i>et al.</i> , 2017           |
| <i>Human Disturbance (human footprint)</i>                                                                                                                                             | HC ~ Human Disturbance + SAC                                               | Higher human disturbance (built-up area and linear infrastructure) increases the chance of encounter. Human casualties will be                                                               | Natarajan <i>et al.</i> , 2023         |

|                                                                                      |                                                                                                                           |                                                                                                                 |                          |
|--------------------------------------------------------------------------------------|---------------------------------------------------------------------------------------------------------------------------|-----------------------------------------------------------------------------------------------------------------|--------------------------|
|                                                                                      |                                                                                                                           | higher where there is higher rate of human disturbance.                                                         |                          |
| <i>Socioeconomic (Human population density, gross domestic product, nightlights)</i> | HC ~ Socioeconomic + SAC                                                                                                  | Human casualties will be higher in densely populated settlements and among people with low economic background. | Ram <i>et al.</i> , 2021 |
| <i>Full Model, with and without quadratic terms</i>                                  | HC ~ Potential HEC + Habitat and Natural Resources + Topography + Fragmentation + Human Disturbance + Socioeconomic + SAC |                                                                                                                 |                          |

**Table S9.** Sources for country-level patterns of wild elephant-caused human casualties across Tropical Asia for the period 2020-2024.

| No | Country          | Period covered             | Total casualties | Source                                                                                                                                         |
|----|------------------|----------------------------|------------------|------------------------------------------------------------------------------------------------------------------------------------------------|
| 1  | India            | 2000, 2009-2024            | 1,581            | Centre for Science and Environment (2025); Lok Sabha Unstarred Questions No. 3194: Elephant-Human Conflict (2023); Pandey <i>et al.</i> (2024) |
| 2  | Sri Lanka        | 2010-2024                  | 358              | Gunawansa <i>et al.</i> (2023)                                                                                                                 |
| 3  | Nepal            | 2000-2020                  | 412              | Ram <i>et al.</i> (2021)                                                                                                                       |
| 4  | Myanmar          | 2010-2022                  | 171              | Forest Department, Myanmar                                                                                                                     |
| 5  | Bangladesh       | 2001-2004, 2005-2009, 2012 | 242              | Hossen (2013)                                                                                                                                  |
| 6  | China            | 2000-2004, 2013-2019       | 105              | Chen <i>et al.</i> (2012); Hu <i>et al.</i> (2021)                                                                                             |
| 7  | Malaysia         | 2006-2021                  | 42               | Department of Wildlife and National Parks Peninsula Malaysia                                                                                   |
| 8  | Laos             | 2000-2020                  | 22               | Ministry of Agriculture and Forestry (2022)                                                                                                    |
| 9  | Cambodia         | 2009, 2011, 2012, 2014     | 4                | <i>Pers. Communication</i>                                                                                                                     |
| 10 | Sabah (Malaysia) | 2011, 2015, 2016, 2023     | 4                | <i>Pers. communication</i>                                                                                                                     |

**Table S10.** Province-level data used to compare predicted risks and actual data.

| No | Country    | Period covered | Source                                                                   |
|----|------------|----------------|--------------------------------------------------------------------------|
| 1  | Bangladesh | 2012           | Hossen, A. (2013)                                                        |
| 2  | Myanmar    | 2010-2022      | Department of Forestry, Myanmar                                          |
| 3  | India      | 2019-2021      | “Lok Sabha Unstarred Questions No. 3194: Elephant-Human Conflict (2023)” |

|          |                  |           |                                                                  |
|----------|------------------|-----------|------------------------------------------------------------------|
| <b>4</b> | <i>Sri Lanka</i> | 2019-2021 | Gunawansa <i>et al.</i> (2023)                                   |
| <b>5</b> | <i>China</i>     | 2000-2004 | Chen <i>et al.</i> (2012); Hu <i>et al.</i> (2021)               |
| <b>6</b> | <i>Malaysia</i>  | 2006-2021 | Department of Wildlife and National Parks of Peninsular Malaysia |
| <b>7</b> | <i>Laos</i>      | 2000-2020 | Ministry of Agriculture and Forestry (2022)                      |
| <b>8</b> | <i>Indonesia</i> | 2015-2020 | Leuser International Foundation (2021)                           |

**Figure S1.** Risk change across all scenarios compared to the baseline scenario (2015).

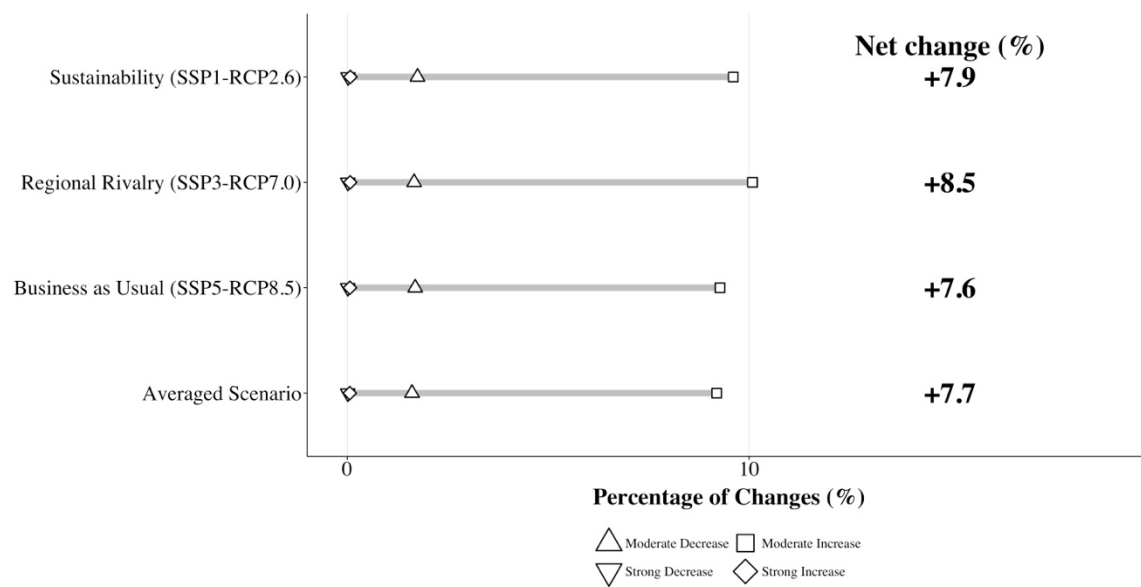

**Figure S2.** Simulated residuals diagnostics of the chosen model.

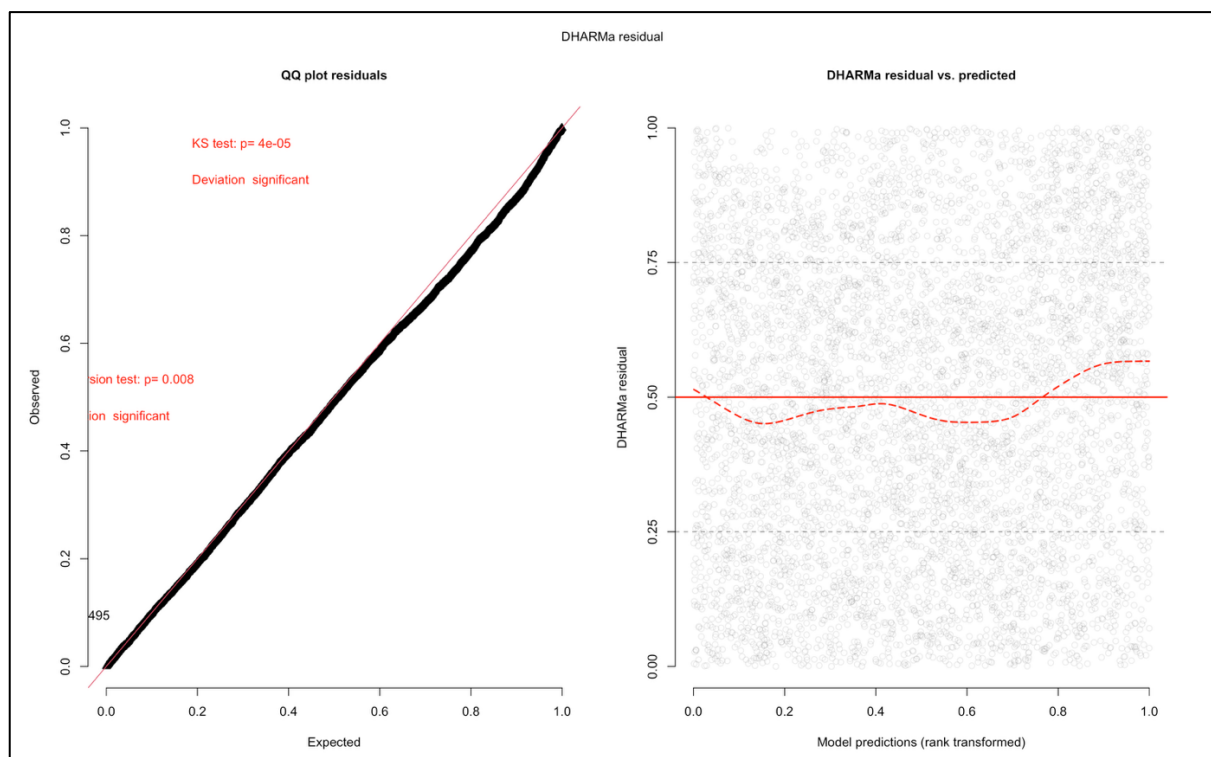

**Figure S3.** Spatial (fitted with Matérn covariance) and non-spatial model correlogram.

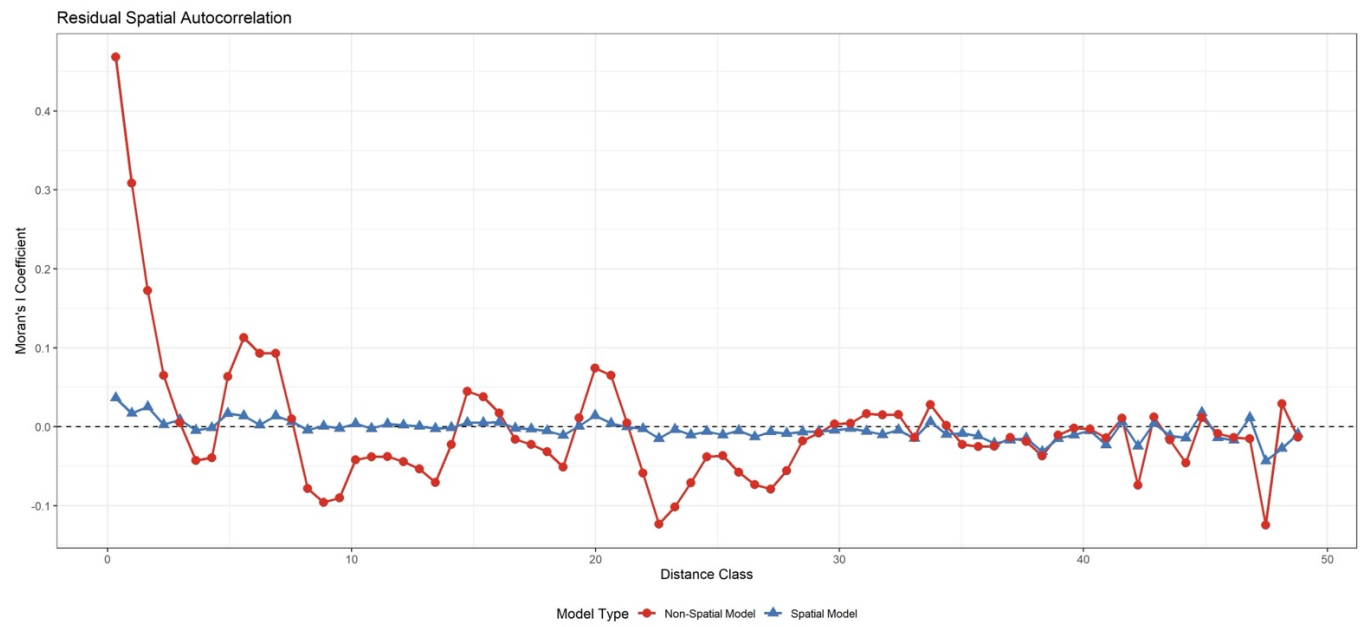

**Figure S4.** Standardized human casualties against the area-weighted predicted mean risk. We validated our predictions to actual data at province-level. Official reports were compiled from 64 provinces across 8 countries (Table S10).

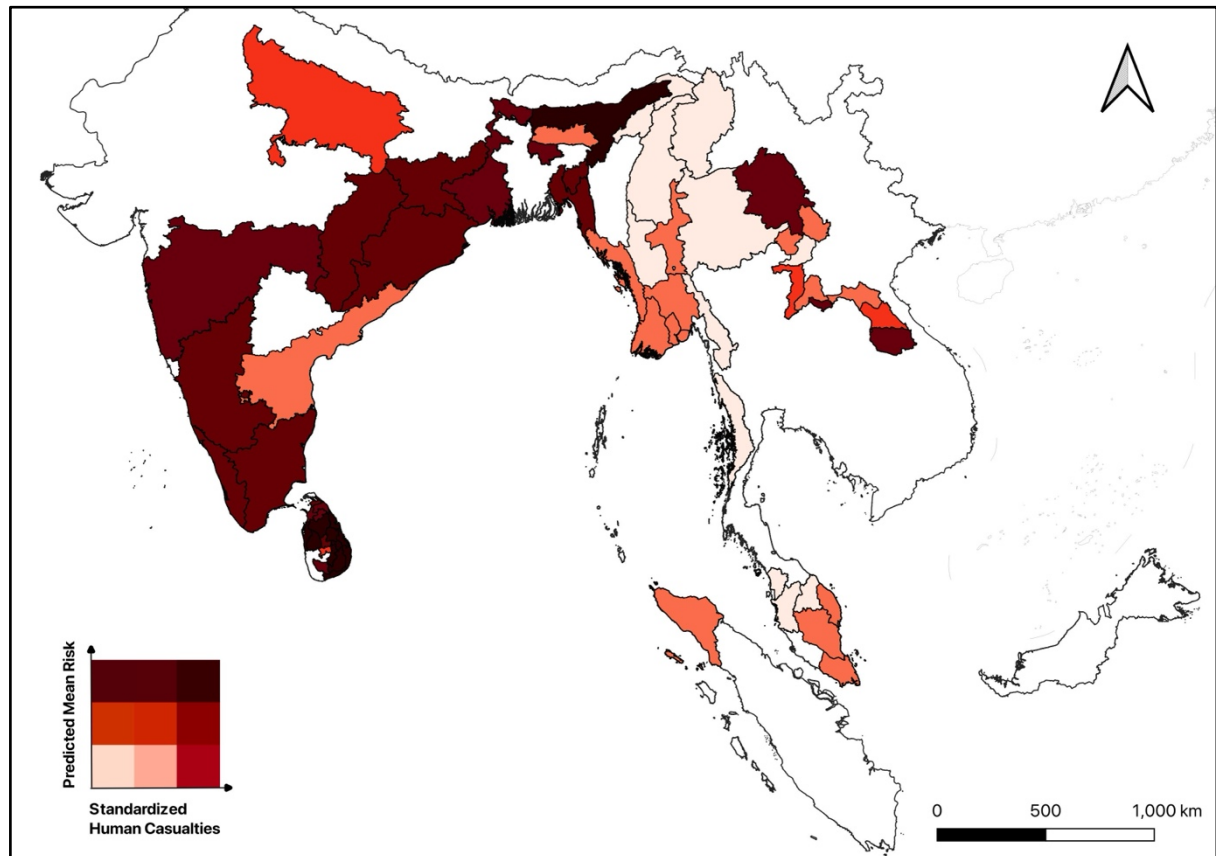

## References

- Acharya, K.P. *et al.* (2017) “Can forest fragmentation and configuration work as indicators of human–wildlife conflict? Evidences from human death and injury by wildlife attacks in Nepal,” *Ecological Indicators*, 80, pp. 74–83. Available at: <https://doi.org/10.1016/j.ecolind.2017.04.037>.
- Center for Science and Environment (2025) *State of India’s Environment: In Figures*.
- Chen, M. (2012) *Studies of Conflict between Human Beings and Elephants in China [in Chinese]*.
- Clogg, C.C., Petkova, E. and Haritou, A. (1995) “Statistical methods for comparing regression coefficients between models,” *American Journal of Sociology*, 100(5), pp. 1261–1293. Available at: <https://doi.org/10.1086/230638>.



- Danielson, J.J. and Gesch, D.B. (2011) *Global multi-resolution terrain elevation data 2010 (GMTED2010), Open-File Report*. 2011–1073. U.S. Geological Survey. Available at: <https://doi.org/10.3133/ofr20111073>.
- Elvidge, C.D. *et al.* (2021) “Annual Time Series of Global VIIRS Nighttime Lights Derived from Monthly Averages: 2012 to 2019,” *Remote Sensing*, 13(5), p. 922. Available at: <https://doi.org/10.3390/rs13050922>.
- Gunawansa, T.D. *et al.* (2023) “The human-elephant conflict in Sri Lanka: history and present status,” *Biodiversity and Conservation*, 32(10), pp. 3025–3052. Available at: <https://doi.org/10.1007/s10531-023-02650-7>.
- Hossen, A. (2013) *Human-elephant conflict in Bangladesh: causes and intensities*. Norwegian University of Science and Technology.
- Hu *et al.* (2021). Research Progress and Prospects of Human-Elephant Conflict at Home and Abroad. *Journal of Beijing Forestry University (Social Science)*, 20(2), pp. 72–79. Available at: <https://doi.org/10.13931/j.cnki.bjfu.2021077>
- IUCN and UNEP-WCMC (2023) “The World Database on Protected Areas (WDPA) [On-line] Available at: [www.protectedplanet.net](http://www.protectedplanet.net). WDPA Updates.”
- Leuser International Foundation (2021) *An update to human-elephant conflict in Aceh, Indonesia*.
- “Lok Sabha Unstarred Questions No. 3194: Elephant-Human Conflict” (2023).
- Ministry of Agriculture and Forestry (2022) *National Elephant Action Plan, Lao PDR, 2022 to 2032*. Ministry of Agriculture and Forestry, Department of Forestry.
- Natarajan, L., Nigam, P. and Pandav, B. (2023) “Impacts of passive elephant rewilding: assessment of human fatalities in India,” *Environmental Conservation*, 50(3), pp. 186–191. Available at: <https://doi.org/10.1017/S0376892923000115>.
- Pandey, R.K. *et al.* (2024) “Elephant conservation in India: Striking a balance between coexistence and conflicts,” *Integrative Conservation*, 3(1), pp. 1–11. Available at: <https://doi.org/10.1002/inc3.38>.
- Paternoster, R. *et al.* (1998) “Using the Correct Statistical Test for the Equality of Regression Coefficients,” *Criminology*, 36(4), pp. 859–866. Available at: <https://doi.org/10.1111/j.1745-9125.1998.tb01268.x>.
- Potapov, P. *et al.* (2022) “Global maps of cropland extent and change show accelerated cropland expansion in the twenty-first century,” *Nature Food*, 3(1), pp. 19–28. Available at: <https://doi.org/10.1038/s43016-021-00429-z>.
- Ram, A.K. *et al.* (2021) “Patterns and determinants of elephant attacks on humans in Nepal,” *Ecology and Evolution*, 11(17), pp. 11639–11650. Available at: <https://doi.org/10.1002/ece3.7796>.

- Tatem, A.J. (2017) “WorldPop, open data for spatial demography,” *Scientific Data*, 4(1), p. 170004. Available at: <https://doi.org/10.1038/sdata.2017.4>.
- de la Torre, J.A. *et al.* (2021) “There will be conflict – agricultural landscapes are prime, rather than marginal, habitats for Asian elephants,” *Animal Conservation*, 24(5), pp. 720–732. Available at: <https://doi.org/10.1111/acv.12668>.
- de la Torre, J.A. *et al.* (2022) “Sundaic elephants prefer habitats on the periphery of protected areas,” *Journal of Applied Ecology*, 59(12), pp. 2947–2958. Available at: <https://doi.org/10.1111/1365-2664.14286>.
- Venter, O. *et al.* (2016) “Sixteen years of change in the global terrestrial human footprint and implications for biodiversity conservation,” *Nature Communications*, 7(1), p. 12558. Available at: <https://doi.org/10.1038/ncomms12558>.
- Wang, T. and Sun, F. (2022) “Global gridded GDP data set consistent with the shared socioeconomic pathways,” *Scientific Data*, 9(1), p. 221. Available at: <https://doi.org/10.1038/s41597-022-01300-x>.
- Xu, H. *et al.* (2024) “Changes in the Fine Composition of Global Forests from 2001 to 2020,” *Journal of Remote Sensing*, 4, p. 0119. Available at: <https://doi.org/10.34133/remotesensing.0119>.
